# Supplementary material for: Risk of malignant paraganglioma in SDHB-mutation and SDHD-mutation carriers: a systematic review and meta-analysis
Source: HighWire-hosted journal article supplement (doi:10.1136/jmedgenet-2012-101192), 2012-10-25
Supplement: jmedgenet-2012-101192supp_appendix.pdf [file jmedgenet-2012-101192supp_appendix.pdf]

## **Appendix 1: Search strategy**

### *PubMed*

(paraganglioma OR paragangliomas OR paragangliom\* OR pheochromocytoma OR pheochromocytomas OR pheochromocytoma\* OR feochromocytoma\* OR "Carotid Body Tumor" OR "Carotid Body Tumour" OR "Carotid Body Tumors" OR "Carotid Body Tumours" OR "Glomus Jugulare Tumor" OR "Glomus Jugulare Tumour" OR "Glomus Jugulare Tumors" OR "Glomus Jugulare Tumours" OR "Glomus Tympanicum Tumor" OR "Glomus Tympanicum Tumour" OR "Glomus Tympanicum Tumors" OR "Glomus Tympanicum Tumours") AND (succinate dehydrogenase OR SDH OR SDHB OR SDHD OR SDH-B OR SDH-D OR SDHB\* OR SDHD\* OR SDH\* OR "Succinic Oxidase" OR "Fumarate Reductase" OR "Succinic Dehydrogenase") AND (malignancy[tw] OR malignancies[tw] OR malignant[tw] OR metastasis OR metastases OR metastatic OR "neoplasm metastasis"[mesh])

### *EMBASE*

(paraganglioma/ OR pheochromocytoma/ OR (paraganglioma OR paragangliomas OR paragangliom\* OR pheochromocytoma OR pheochromocytomas OR pheochromocytoma\* OR feochromocytoma\* OR "Carotid Body Tumor" OR "Carotid Body Tumour" OR "Carotid Body Tumors" OR "Carotid Body Tumours" OR "Glomus Jugulare Tumor" OR "Glomus Jugulare Tumour" OR "Glomus Jugulare Tumors" OR "Glomus Jugulare Tumours" OR "Glomus Tympanicum Tumor" OR "Glomus Tympanicum Tumour" OR "Glomus Tympanicum Tumors" OR "Glomus Tympanicum

Tumours").mp) AND (succinate dehydrogenase/ OR (succinate dehydrogenase OR SDH OR SDHB OR SDHD OR SDH-B OR SDH-D OR SDHB\* OR SDHD\* OR SDH\* OR "Succinic Oxidase" OR "Fumarate Reductase" OR "Succinic Dehydrogenase").mp) AND (metastasis/ OR (malignancy OR malignancies OR malignan\* OR metasta\*).mp)

### *Web of Science*

TS=((paragangliom\* OR pheochromocytom\* OR feochromocytom\* OR Carotid Body Tumor OR Carotid Body Tumour OR Carotid Body Tumors OR Carotid Body Tumours OR Glomus Jugulare Tumor OR Glomus Jugulare Tumour OR Glomus Jugulare Tumors OR Glomus Jugulare Tumours OR Glomus Tympanicum Tumor OR Glomus Tympanicum Tumour OR Glomus Tympanicum Tumors OR Glomus Tympanicum Tumours) AND (succinate dehydrogenase OR SDH OR SDHB OR SDHD OR SDH-B OR SDH-D OR SDHB\* OR SDHD\* OR SDH\* OR Succinic Oxidase OR Fumarate Reductase OR Succinic Dehydrogenase) AND (metastasis OR malignancy OR malignancies OR malignan\* OR metasta\*))

### *COCHRANE*

((paragangliom\* OR pheochromocytom\* OR feochromocytom\* OR Carotid Body Tumor OR Carotid Body Tumour OR Carotid Body Tumors OR Carotid Body Tumours OR Glomus Jugulare Tumor OR Glomus Jugulare Tumour OR Glomus Jugulare Tumors OR Glomus Jugulare Tumours OR Glomus Tympanicum Tumor OR Glomus Tympanicum Tumour OR Glomus Tympanicum Tumors OR Glomus Tympanicum Tumours) AND (succinate dehydrogenase OR SDH OR SDHB OR SDHD OR SDH-B

OR SDH-D OR SDHB\* OR SDHD\* OR SDH\* OR Succinic Oxidase OR Fumarate  
Reductase OR Succinic Dehydrogenase) AND (metastasis OR malignancy OR  
malignancies OR malignan\* OR metasta\*))

*Academic Search Premier*

ti/ab/kw/su

(paragangliom\* OR pheochromocytom\* OR feochromocytom\* OR Carotid Body Tumor  
OR Carotid Body Tumour OR Carotid Body Tumors OR Carotid Body Tumours OR  
Glomus Jugulare Tumor OR Glomus Jugulare Tumour OR Glomus Jugulare Tumors OR  
Glomus Jugulare Tumours OR Glomus Tympanicum Tumor OR Glomus Tympanicum  
Tumour OR Glomus Tympanicum Tumors OR Glomus Tympanicum Tumours) AND  
(succinate dehydrogenase OR SDH OR SDHB OR SDHD OR SDH-B OR SDH-D OR  
SDHB\* OR SDHD\* OR SDH\* OR Succinic Oxidase OR Fumarate Reductase OR  
Succinic Dehydrogenase) AND

all txt

(metastasis OR malignancy OR malignancies OR malignan\* OR metasta\*)
